# Supplementary material for: ERα promotes murine hematopoietic regeneration through the Ire1α-mediated unfolded protein response
Source: eLife journal article supplement (doi:10.7554/elife.31159), 2018-02-16
Supplement: supp [file elife-31159-supp-v1.zip]

Archive with 9 entries (9 files):
- elife_poa_e31159_Figure_2_figure_supplement_1.ai
- elife_poa_e31159_Figure_1_figure_supplement_1.ai
- elife_poa_e31159_Figure_4_figure_supplement_1.ai
- elife_poa_e31159_Figure_6_figure_supplement_1.ai
- elife_poa_e31159_Figure_4_figure_supplement_2.ai
- elife_poa_e31159_Figure_5_figure_supplement_1.ai
- elife_poa_e31159_Transparent_Reporting_File.pdf
- elife_poa_e31159_Supplementary_File_1.docx
- elife_poa_e31159_Figure_3_figure_supplement_1.ai
